# Supplementary material
Source: HighWire-hosted journal article supplement (https://cmajopen.ca/highwire/filestream/84913/field_highwire_adjunct_files/7/CMAJOpen-2020-0177-5-at.pdf)
Supplement: CMAJOpen-2020-0177-5-at.pdf [file CMAJOpen-2020-0177-5-at.pdf]

**Appendix 5 (as supplied by the authors): Detailed Blinder-Oaxaca decomposition results for lifetime suicide ideation**

|                                  | Total                   |                          |                       | Women                  |                          |                      | Men                    |                          |                     |
|----------------------------------|-------------------------|--------------------------|-----------------------|------------------------|--------------------------|----------------------|------------------------|--------------------------|---------------------|
|                                  | Marginal Effects        | Blinder-Oaxaca Explained | Unexplained           | Marginal Effects       | Blinder-Oaxaca Explained | Unexplained          | Marginal Effects       | Blinder-Oaxaca Explained | Unexplained         |
| <b>Indigenous Identity</b>       |                         |                          |                       |                        |                          |                      |                        |                          |                     |
| Indigenous (Ref.)                |                         |                          |                       |                        |                          |                      |                        |                          |                     |
| Non-Indigenous                   | -0.04120***<br>(0.0105) |                          |                       | -0.0505***<br>(0.0155) |                          |                      | -0.0335**<br>(0.0142)  |                          |                     |
| <b>Demographic Variables</b>     |                         |                          |                       |                        |                          |                      |                        |                          |                     |
| Gender                           |                         |                          |                       |                        |                          |                      |                        |                          |                     |
| Male                             | -0.0105<br>(0.0068)     | 0.0001<br>(9.95e-05)     | -0.0012<br>(0.0112)   |                        |                          |                      |                        |                          |                     |
| Female (Ref.)                    |                         | 0.0001<br>(9.95e-05)     | 0.0011<br>(0.0105)    |                        |                          |                      |                        |                          |                     |
| Age                              | -0.0011***<br>(0.0003)  | -0.0079***<br>(0.0022)   | -0.0012<br>(0.0729)   | -0.0012***<br>(0.0004) | -0.0082**<br>(0.0034)    | 0.0054<br>(0.1120)   | -0.0009***<br>(0.0004) | -0.0071**<br>(0.0029)    | 0.0601<br>(0.2980)  |
| Marital Status                   |                         |                          |                       |                        |                          |                      |                        |                          |                     |
| Married or common law (Ref.)     |                         | 6.66e-05<br>(0.0003)     | 0.0344<br>(0.0337)    |                        | 0.00036<br>(0.0004)      | 0.0876<br>(0.0635)   |                        | -0.0002<br>(0.0003)      | -0.0377<br>(0.1530) |
| Divorced or widowed              | -0.0035<br>(0.0147)     | -9.73e-05<br>(0.0002)    | -0.0025<br>(0.0056)   | -0.0104<br>(0.0197)    | -0.0001<br>(0.0002)      | -0.0187<br>(0.0139)  | 0.0096<br>(0.0198)     | 9.59e-05<br>(0.0003)     | 0.0231<br>(0.0480)  |
| Single                           | 0.0020<br>(0.0131)      | -9.23e-05<br>(0.0004)    | -0.0103<br>(0.0120)   | -0.0109<br>(0.0162)    | 0.0002<br>(0.0005)       | -0.0095<br>(0.0164)  | 0.0141<br>(0.0193)     | -0.0002<br>(0.0005)      | -0.0828<br>(0.1740) |
| <b>Socioeconomic Variables</b>   |                         |                          |                       |                        |                          |                      |                        |                          |                     |
| Log Equivalized Household Income | -0.0109***<br>(0.0038)  | -0.0025***<br>(0.0009)   | 0.0803<br>(0.2830)    | -0.0125**<br>(0.0054)  | -0.0027**<br>(0.0012)    | -0.3300<br>(0.4260)  | -0.0105**<br>(0.0052)  | -0.0026*<br>(0.0015)     | 1.8970<br>(4.2140)  |
| Education                        |                         |                          |                       |                        |                          |                      |                        |                          |                     |
| Less than high school (Ref.)     |                         | -0.0019**<br>(0.0009)    | 0.0216**<br>(0.0102)  |                        | -0.0011<br>(0.0008)      | 0.0246*<br>(0.0128)  |                        | -0.0026<br>(0.0017)      | 0.0568<br>(0.1280)  |
| High school                      | -0.0271*<br>(0.0140)    | -0.0001<br>(9.98e-05)    | -0.0103<br>(0.0074)   | -0.0333<br>(0.0213)    | 0.0005<br>(0.0003)       | -0.0122<br>(0.0130)  | -0.0196<br>(0.0178)    | -0.0002<br>(0.0006)      | -0.0183<br>(0.0435) |
| Some post-secondary              | -0.0292*<br>(0.0176)    | -5.64e-05<br>(6.42e-05)  | 0.00351<br>(0.0040)   | -0.0265<br>(0.0272)    | 9.11e-05<br>(0.0002)     | 0.0021<br>(0.0069)   | -0.0279<br>(0.0216)    | -0.0002<br>(0.0003)      | 0.0134<br>(0.0304)  |
| Bachelor's degree or higher      | -0.0201<br>(0.0128)     | -0.0002<br>(0.0003)      | -0.0509**<br>(0.0221) | -0.0127<br>(0.0201)    | 0.0002<br>(0.0009)       | -0.0576<br>(0.0358)  | -0.0254*<br>(0.0154)   | -0.0004<br>(0.0003)      | -0.1890<br>(0.3990) |
| Employment Status                |                         |                          |                       |                        |                          |                      |                        |                          |                     |
| Employed (Ref.)                  |                         | 0.0004<br>(0.0004)       | 0.0381<br>(0.0242)    |                        | -3.91e-05<br>(2.61e-05)  | 0.0815**<br>(0.0411) |                        | 5.50e-05<br>(0.0012)     | -0.0705<br>(0.1660) |

Appendix to: Hajizadeh M, Hu M, Asada Y, et al. Explaining the gaps in psychological distress and suicidal behaviours between non-Indigenous and Indigenous adults living off-reserve in Canada: a cross-sectional study. *CMAJ Open* 2021. DOI:10.9778/cmajo.20200177. Copyright © 2021 The Author(s) or their employer(s). To receive this resource in an accessible format, please contact us at [cmajgroup@cmaj.ca](mailto:cmajgroup@cmaj.ca).

|                                           |                        |                         |                     |                       |                         |                     |                       |                          |                     |
|-------------------------------------------|------------------------|-------------------------|---------------------|-----------------------|-------------------------|---------------------|-----------------------|--------------------------|---------------------|
| Unemployed                                | 0.0002<br>(0.0079)     | -0.0003<br>(0.0004)     | -0.0156<br>(0.0116) | -0.0009<br>(0.0119)   | -0.00038<br>(0.0004)    | -0.0126<br>(0.0189) | -0.0014<br>(0.0106)   | 7.26e-05<br>(0.0007)     | -0.0650<br>(0.1370) |
| Other employment status                   | -0.0173<br>(0.0151)    | -0.0002<br>(0.0001)     | -0.0017<br>(0.0040) | -0.0287<br>(0.0215)   | -0.0012*<br>(0.0006)    | -0.0069<br>(0.0051) | -0.0049<br>(0.0205)   | -5.83e-06<br>(0.0003)    | 0.0309<br>(0.0651)  |
| Homeownership                             |                        |                         |                     |                       |                         |                     |                       |                          |                     |
| Owner (Ref.)                              |                        | -0.0018***<br>(0.0005)  | -0.0248<br>(0.0156) |                       | -0.0028***<br>(0.0010)  | 0.0058<br>(0.0208)  |                       | -0.0011*<br>(0.0006)     | -0.1630<br>(0.3460) |
| Renter                                    | 0.0262***<br>(0.0077)  | -0.0018***<br>(0.0005)  | 0.0127<br>(0.0080)  | 0.0351***<br>(0.0116) | -0.0028***<br>(0.0010)  | -0.0034<br>(0.0123) | 0.0157<br>(0.0103)    | -0.0011*<br>(0.0006)     | 0.0717<br>(0.1530)  |
| Household Arrangement                     |                        |                         |                     |                       |                         |                     |                       |                          |                     |
| Single person (Ref.)                      |                        | 0.0009***<br>(0.0003)   | -0.0021<br>(0.0066) |                       | 0.0012*<br>(0.0007)     | 0.0093<br>(0.0108)  |                       | 0.0004**<br>(0.0002)     | -0.0460<br>(0.1030) |
| Couple with no child                      | -0.0287**<br>(0.0137)  | -0.0006<br>(0.0007)     | -0.0146<br>(0.0172) | -0.0267<br>(0.0180)   | -0.0002<br>(0.0002)     | -0.0307<br>(0.0310) | -0.0286<br>(0.0197)   | -0.0006<br>(0.0020)      | -0.0347<br>(0.0968) |
| Couple with child(ren)<br>younger than 25 | -0.0385***<br>(0.0139) | 0.0004<br>(0.0003)      | 0.0381<br>(0.0239)  | -0.0332*<br>(0.0187)  | -0.0011<br>(0.0001)     | -0.0050<br>(0.0222) | -0.0414**<br>(0.0196) | 0.0014<br>(0.0019)       | 0.2240<br>(0.5110)  |
| Separate with a child(ren)<br>younger     | -0.0209<br>(0.0151)    | -3.08e-05<br>(0.0004)   | 0.0008<br>(0.0050)  | -0.0074<br>(0.0207)   | -0.0007<br>(0.0011)     | 0.0051<br>(0.0102)  | -0.0437**<br>(0.0210) | -2.73e-05<br>(3.28e-05)  | 0.0092<br>(0.0204)  |
| Other household<br>compositions           | -0.0220**<br>(0.0093)  | 9.25e-05<br>(0.0004)    | -0.0102<br>(0.0088) | -0.0243<br>(0.0148)   | 0.0005<br>(0.0010)      | 0.0017<br>(0.0150)  | -0.0190<br>(0.0116)   | -0.0001<br>(0.0003)      | -0.0569<br>(0.1240) |
| <b>Geographical Factors</b>               |                        |                         |                     |                       |                         |                     |                       |                          |                     |
| Urbanicity                                |                        |                         |                     |                       |                         |                     |                       |                          |                     |
| Urban                                     | 0.0111<br>(0.0087)     | -4.54e-05<br>(3.84e-05) | -0.0164<br>(0.0250) | 0.0001<br>(0.0129)    | 6.19e-06<br>(3.25e-05)  | -0.0374<br>(0.0389) | 0.0225**<br>(0.0110)  | -0.0002**<br>(8.68e-05)  | 0.0272<br>(0.0996)  |
| Rural (Ref.)                              |                        | -4.54e-05<br>(3.84e-05) | 0.0045<br>(0.0070)  |                       | 6.19e-06<br>(3.25e-05)  | 0.0098<br>(0.0102)  |                       | -0.00012**<br>(8.68e-05) | -0.0080<br>(0.0292) |
| Geographic Region                         |                        |                         |                     |                       |                         |                     |                       |                          |                     |
| Atlantic                                  | -0.0059<br>(0.0095)    | 0.0001**<br>(4.94e-05)  | 0.00354<br>(0.0045) | -0.0205<br>(0.0145)   | 6.46e-05*<br>(3.35e-05) | 0.00311<br>(0.0059) | 0.0076<br>(0.0121)    | 0.0001<br>(0.0001)       | 0.0121<br>(0.0316)  |
| Quebec                                    | 0.0112<br>(0.0104)     | 0.0003<br>(0.0015)      | -0.0055<br>(0.0057) | -0.0026<br>(0.0157)   | -0.0008<br>(0.0022)     | -0.0077<br>(0.0081) | 0.0251*<br>(0.0130)   | 0.0017<br>(0.0020)       | -0.0157<br>(0.0386) |
| Ontario, (Ref.)                           |                        | -0.0003<br>(0.0002)     | -0.0018<br>(0.0129) |                       | -9.54e-05<br>(0.0009)   | -0.0097<br>(0.0157) |                       | 0.0006*<br>(0.0003)      | 0.0450<br>(0.1160)  |
| Prairie                                   | 0.0176**<br>(0.0086)   | -0.0018<br>(0.0012)     | 0.0016<br>(0.0115)  | 0.0027<br>(0.0123)    | -0.0006<br>(0.0020)     | -0.0140<br>(0.0177) | 0.0313***<br>(0.0119) | -0.0025*<br>(0.0014)     | 0.0509<br>(0.1110)  |
| British Columbia                          | 0.0191*<br>(0.0100)    | -0.0005<br>(0.0003)     | 0.0032<br>(0.0068)  | 0.0152<br>(0.0146)    | -0.0014**<br>(0.0007)   | 0.0197<br>(0.0125)  | 0.0221<br>(0.0140)    | -4.50e-05<br>(0.0003)    | -0.0329<br>(0.0767) |
| Constant                                  |                        |                         | -0.1320<br>(0.2730) |                       |                         | 0.2270<br>(0.4060)  |                       |                          | -1.745<br>(3.8610)  |

Appendix to: Hajizadeh M, Hu M, Asada Y, et al. Explaining the gaps in psychological distress and suicidal behaviours between non-Indigenous and Indigenous adults living off-reserve in Canada: a cross-sectional study. *CMAJ Open* 2021. DOI:10.9778/cmajo.20200177. Copyright © 2021 The Author(s) or their employer(s). To receive this resource in an accessible format, please contact us at [cmajgroup@cmaj.ca](mailto:cmajgroup@cmaj.ca).

|                             |                        |                        |                        |                        |                        |                        |                        |                        |                       |
|-----------------------------|------------------------|------------------------|------------------------|------------------------|------------------------|------------------------|------------------------|------------------------|-----------------------|
| <b>Absolute Differences</b> | -0.0757***<br>(0.0158) |                        |                        | -0.0939***<br>(0.0223) |                        |                        | -0.0590***<br>(0.0185) |                        |                       |
| <b>Sum</b>                  |                        | -0.0179***<br>(0.0037) | -0.0577***<br>(0.0162) |                        | -0.0209***<br>(0.0064) | -0.0730***<br>(0.0238) |                        | -0.0149***<br>(0.0048) | -0.0441**<br>(0.0195) |
| <b>Observations</b>         | 18,300                 |                        |                        | 10049                  |                        |                        | 8,251                  |                        |                       |

**Note:** Ref. = reference category in the logistic model estimation; Marginal effects are calculated at the means of the independent variables; \*\*\* p<0.01, \*\* p<0.05, \* p<0.1
